# Supplementary material for: Infrared spectra of the protonated neurotransmitter histamine: competition between imidazolium and ammonium isomers in the gas phase
Source: Royal Society of Chemistry journal article supplement (doi:10.1039/c1cp21681c), 2011-01-01

## Supplementary Information

### **Infrared spectra of the protonated neurotransmitter histamine: Competition between imidazolium and ammonium isomers in the gas phase**

Anita Lagutschenkov,<sup>1</sup> Judith Langer,<sup>1</sup> Giel Berden,<sup>2</sup> Jos Oomens<sup>2,3</sup> and Otto Dopfer<sup>1\*</sup>

<sup>1</sup> *Institut für Optik und Atomare Physik, Technische Universität Berlin, Hardenbergstraße 36, 10623 Berlin, Germany*

<sup>2</sup> *FOM Institute for Plasma Physics Rijnhuizen, Edisonbaan 14, 3439MN Nieuwegein, The Netherlands*

<sup>3</sup> *van't Hoff Institute for Molecular Sciences, University of Amsterdam, Science Park 904, 1098XH Amsterdam, The Netherlands*

\* corresponding author: Otto Dopfer: dopfer@physik.tu-berlin.de, Fax: (+49) 30-31423018

**Table S1.** Selected bond distances (in Å), dihedral angles (in degrees), and relative energies and relative free energies at 298 K (in kJ/mol) of all considered isomers of histamineH<sup>+</sup> calculated at the B3LYP/cc-pVDZ and MP2/cc-pVDZ levels (Fig. 3).

|                                                       | <b>A</b>                |                         | <b>B</b>                |                         | <b>C</b>            |                     | <b>D</b>            |                     | <b>E</b>            |                     |
|-------------------------------------------------------|-------------------------|-------------------------|-------------------------|-------------------------|---------------------|---------------------|---------------------|---------------------|---------------------|---------------------|
|                                                       | B3LYP                   | MP2                     | B3LYP                   | MP2                     | B3LYP               | MP2                 | B3LYP               | MP2                 | B3LYP               | MP2                 |
| $\phi_1$<br>$\phi_2$                                  | -57.9<br>36.2           | -59.4<br>36.4           | -56.9<br>37.3           | -59.4<br>38.6           | 59.5<br>146.0       | 60.7<br>144.7       | 174.5<br>66.8       | 174.8<br>70.7       | 176.4<br>-173.9     | 176.5<br>-175.9     |
| $R_{N\cdots H}$<br>$R_{N\cdots H}$<br>$R_{N\cdots H}$ | 1.790<br>1.059<br>1.016 | 1.742<br>1.065<br>1.019 | 1.106<br>1.587<br>1.015 | 1.092<br>1.614<br>1.018 | -<br>1.016<br>1.016 | -<br>1.020<br>1.019 | -<br>1.017<br>1.017 | -<br>1.020<br>1.020 | -<br>1.017<br>1.017 | -<br>1.020<br>1.020 |
| $\Delta E$<br>$\Delta G$                              | 0.0<br>0.0              | 1.6<br>1.7              | 6.2<br>6.3              | 0.0<br>0.0              | 34.3<br>32.2        | 37.1<br>35.1        | 52.6<br>48.1        | 59.4<br>54.7        | 53.2<br>48.1        | 60.7<br>55.3        |

  

|                                                       | <b>F</b>            |                     | <b>G</b>            |                     | <b>H</b>            |                     | <b>I</b>        |                 | <b>J</b>        |                 |
|-------------------------------------------------------|---------------------|---------------------|---------------------|---------------------|---------------------|---------------------|-----------------|-----------------|-----------------|-----------------|
|                                                       | B3LYP               | MP2                 | B3LYP               | MP2                 | B3LYP               | MP2                 | B3LYP           | MP2             | B3LYP           | MP2             |
| $\phi_1$<br>$\phi_2$                                  | -167.2<br>46.2      | -168.7<br>47.1      | 51.8<br>-151.8      | 52.1<br>-150.8      | 176.6<br>90.0       | 176.7<br>93.2       | 177.8<br>-68.3  | 177.3<br>-66.4  | 180.0<br>180.0  | 180<br>180      |
| $R_{N\cdots H}$<br>$R_{N\cdots H}$<br>$R_{N\cdots H}$ | 1.030<br>-<br>1.014 | 1.030<br>-<br>1.017 | -<br>1.014<br>1.044 | -<br>1.017<br>1.042 | 1.030<br>1.014<br>- | 1.030<br>1.016<br>- | -<br>-<br>1.035 | -<br>-<br>1.037 | -<br>-<br>1.035 | -<br>-<br>1.037 |
| $\Delta E$<br>$\Delta G$                              | 77.1<br>73.1        | 69.6<br>65.7        | 102.4<br>99.9       | 93.5<br>91.2        | 123.1<br>117.8      | 117.8<br>112.4      | 258.1<br>253.7  | 27.0<br>266.8   | 261.0<br>256.4  | 273.5<br>269.7  |

**Figure S1.** Bond distances (in Å) and selected bond angles of the two low-energy isomers **A** and **B** of histamineH<sup>+</sup>, calculated at the B3LYP (black) and MP2 (red) levels using the cc-pVDZ basis set.

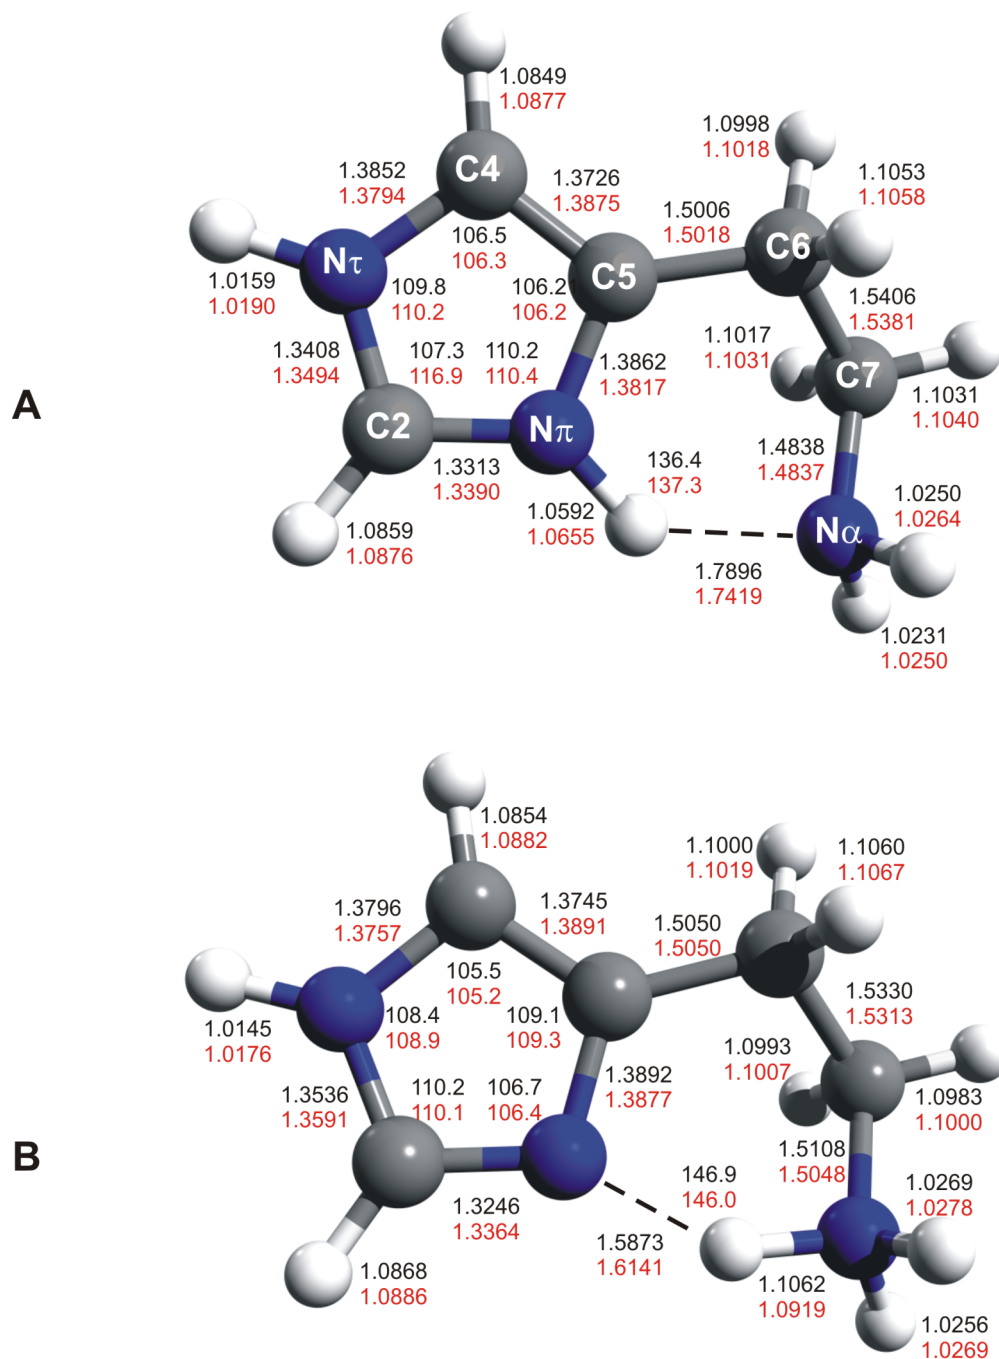

**Figure S2.** Bond distances (in Å), selected bond angles, and NBO charge distribution (bottom) of the transition state **TS** between the two low-energy isomers **A** and **B** of histamineH<sup>+</sup>, calculated at the B3LYP (black) and MP2 (red) levels using the cc-pVDZ basis set.

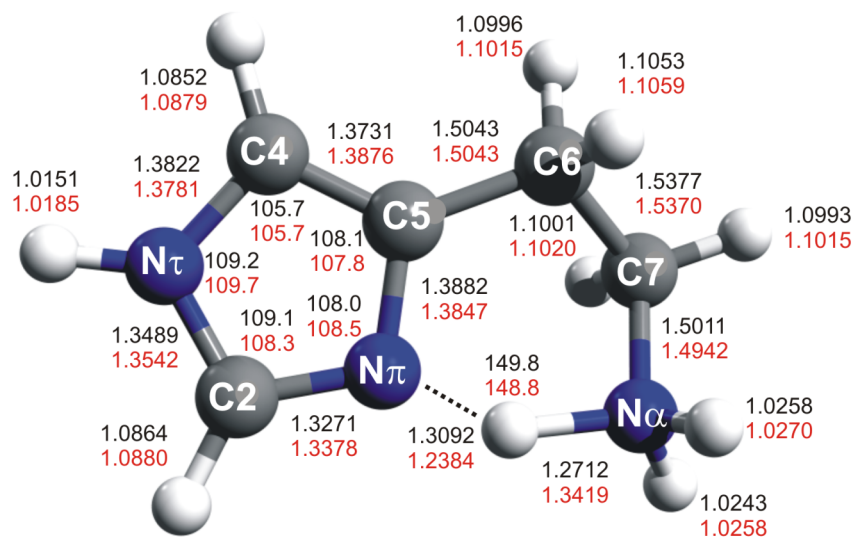

**TS\_AB**

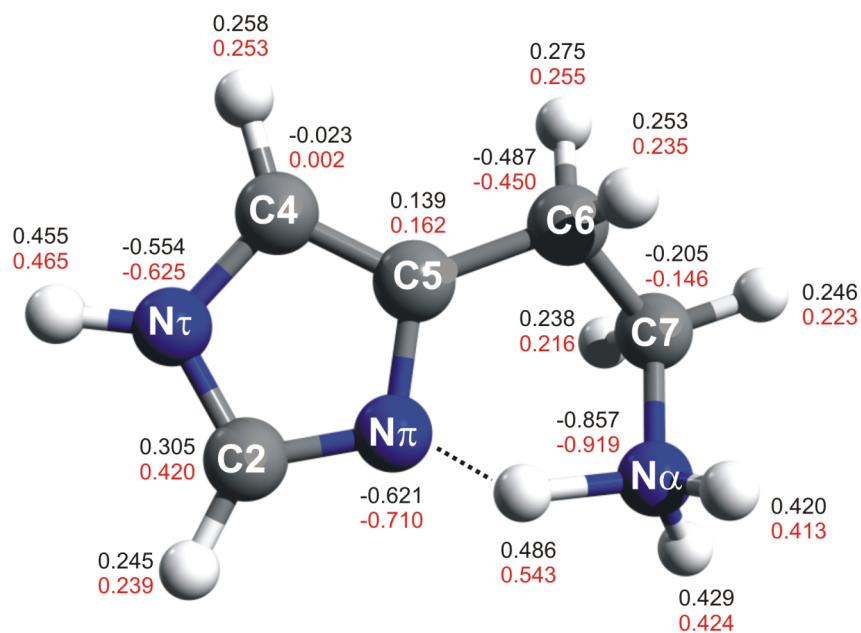



**Figure S3.** Potential energy scan of histamineH<sup>+</sup> along the proton transfer isomerization coordinate connecting the two minima **A** and **B** via a transition state **TS** (B3LYP/cc-pVDZ). The energies were obtained by changing the N $\pi$ -H bond distance and optimizing all other coordinates.

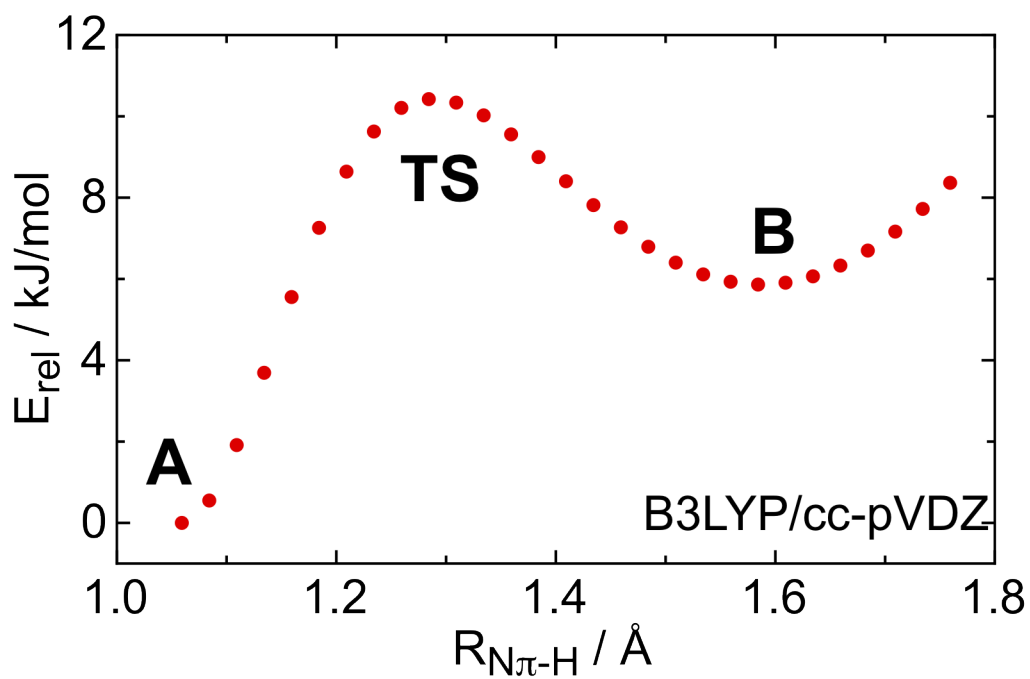

**Figure S4.** NBO charge distribution of the two low-energy isomers **A** and **B** of histamineH<sup>+</sup>, calculated at the B3LYP (black) and MP2 (red) levels using the cc-pVDZ basis set.

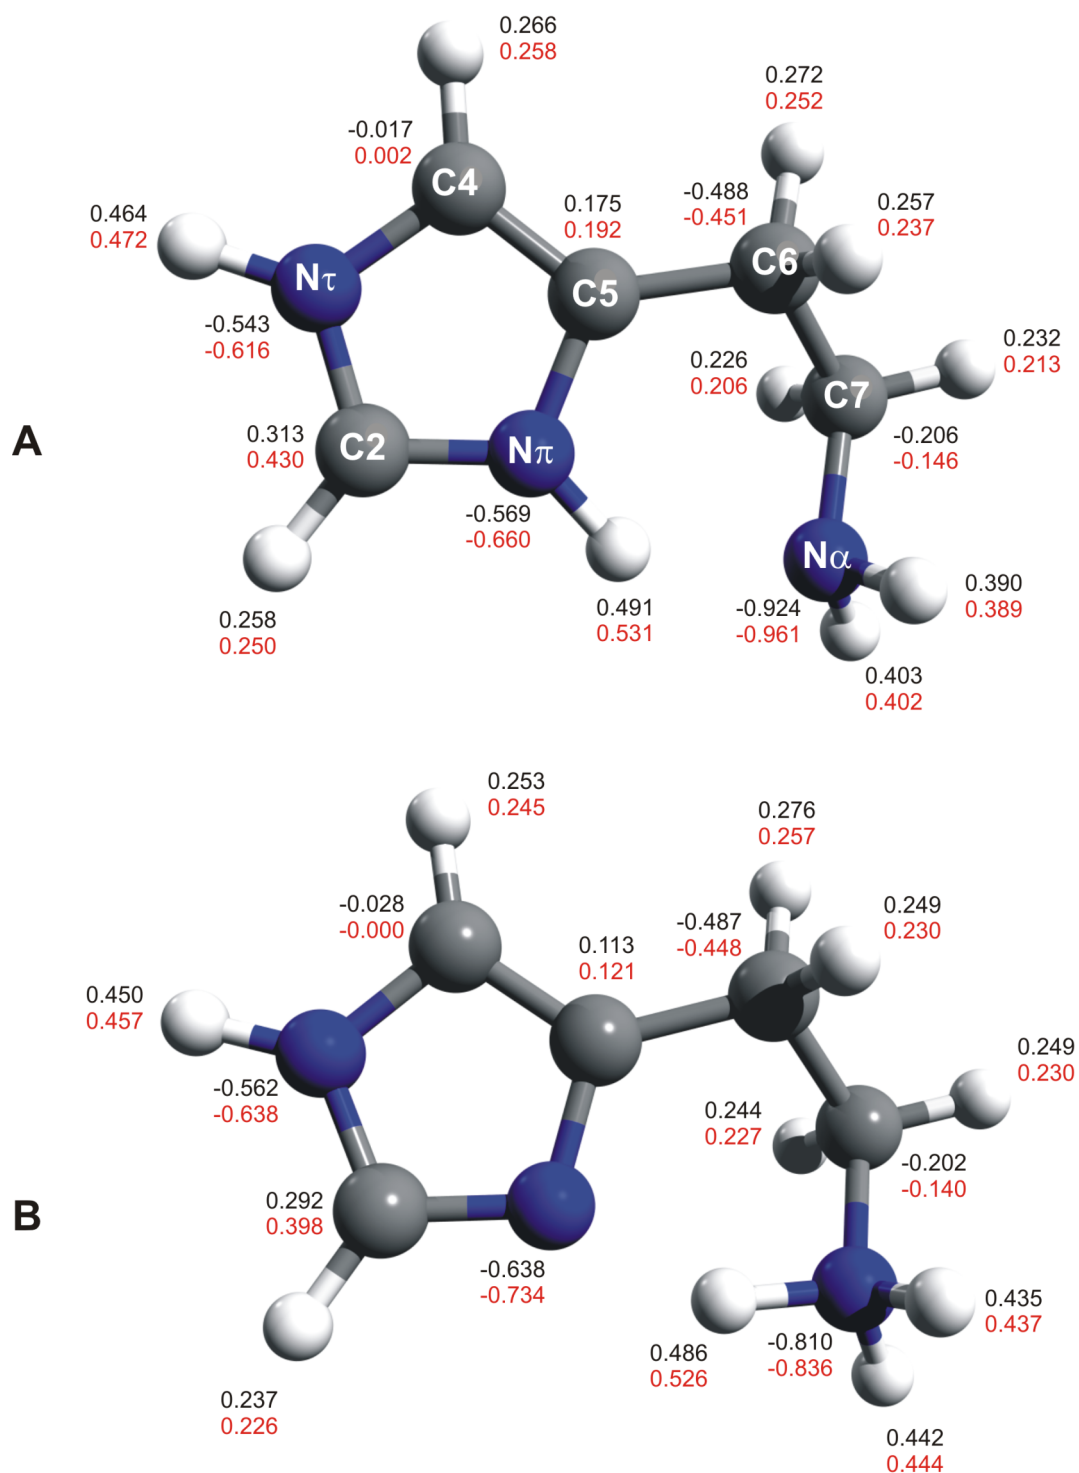

**Figure S5.** Calculated absorption spectra (B3LYP/cc-pVDZ) of isomers **A-J** of histamineH<sup>+</sup> compared to the IRMPD spectrum. Intensities are all on the same scale. Relative energy differences ( $\Delta E$  in kJ/mol) are given in parentheses.

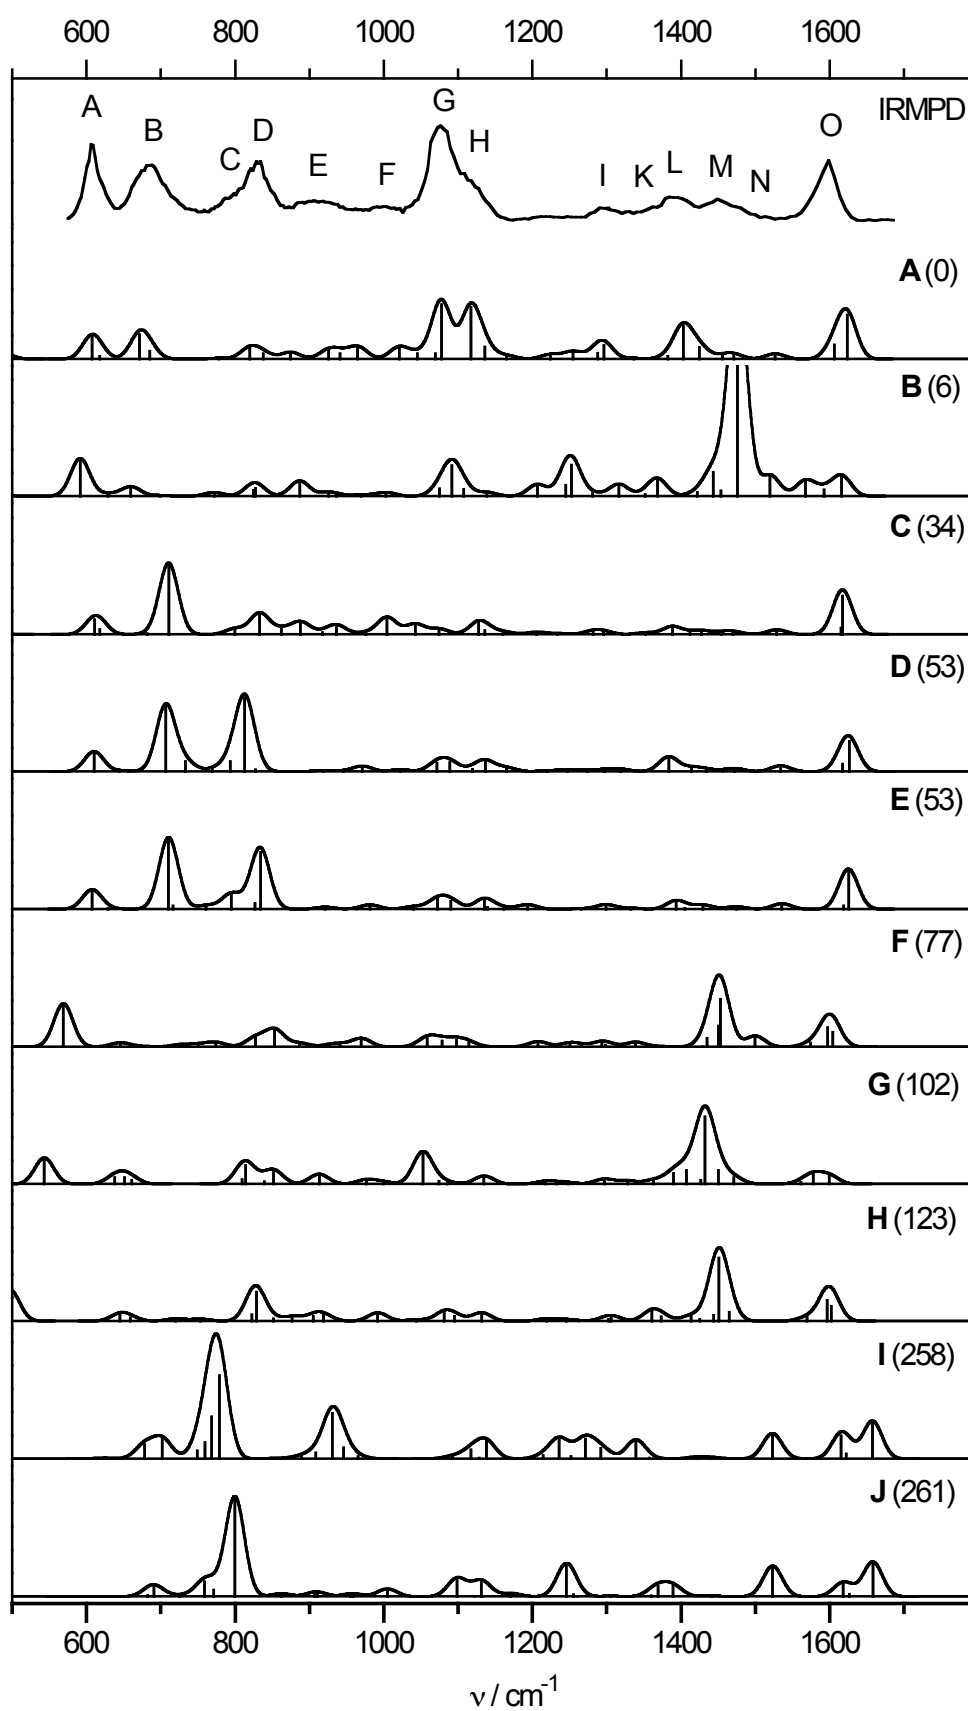

**Figure S6.** Comparison of linear IR absorption spectra of the isomers **A** and **B** of histamineH<sup>+</sup> in harmonic (scaling factor 0.98) and anharmonic approximation (B3LYP/cc-pVDZ).

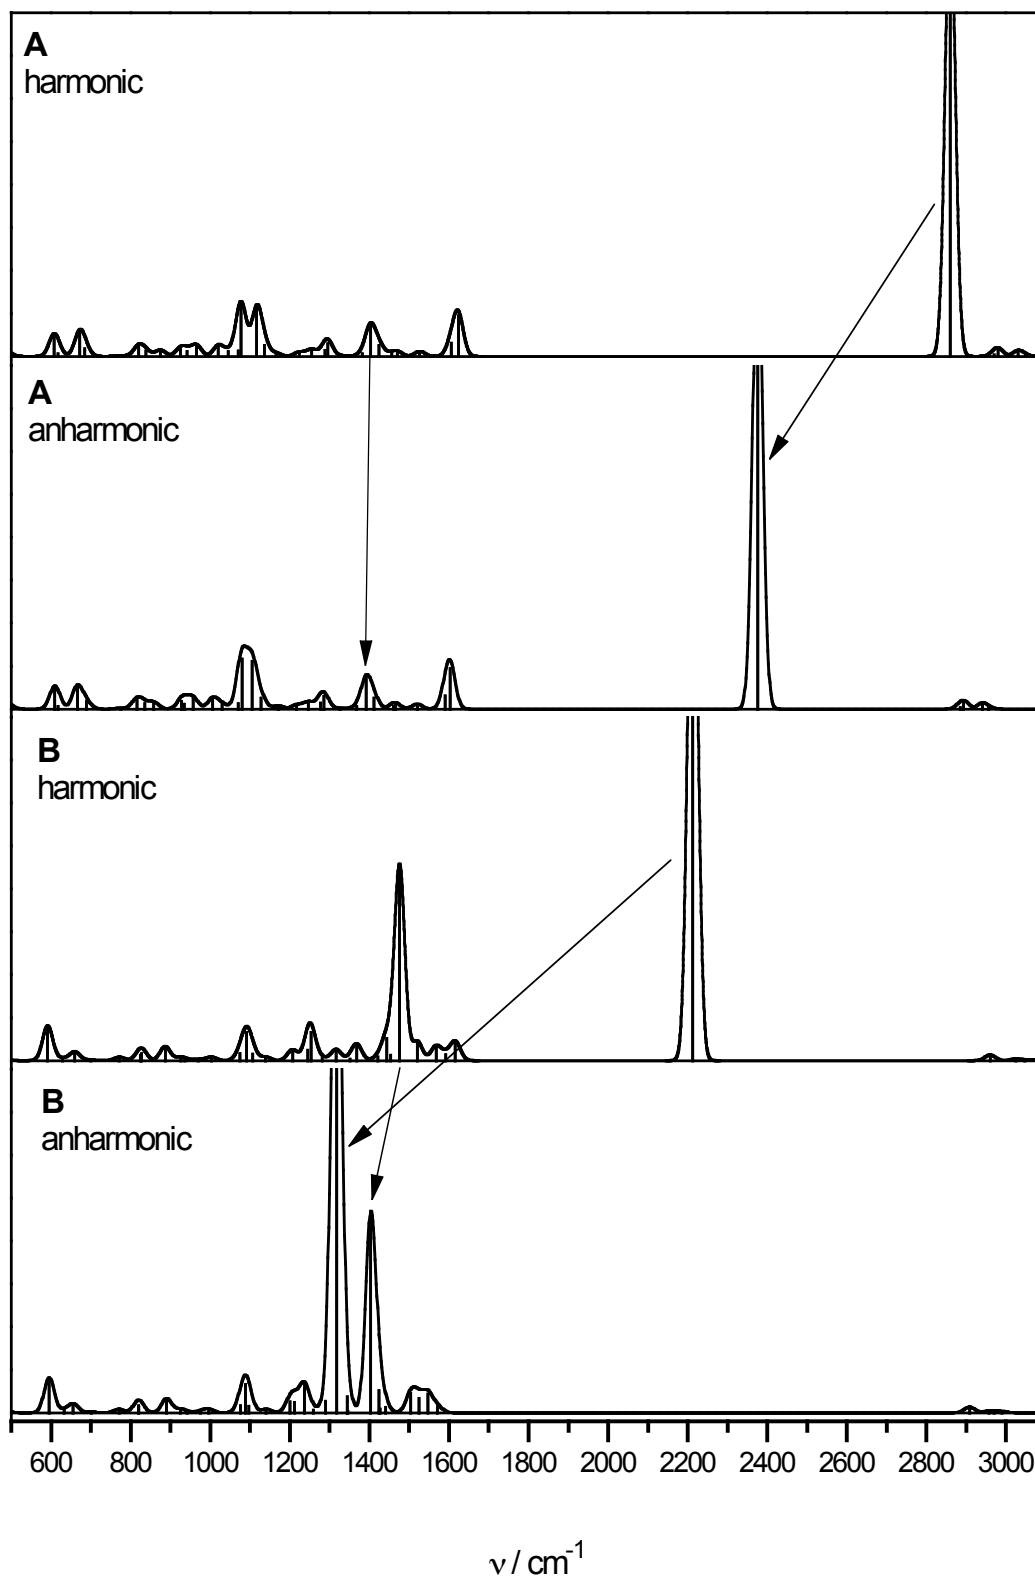

**Figure S7.** Comparison of linear IR absorption spectra of the isomers **A** and **B** of histamineH<sup>+</sup> and the corresponding transition state **TS** (B3LYP/cc-pVDZ) with the experimental IRMPD spectrum. Calculated intensities are all drawn to the same scale. The most intense for isomer **B** peak is cut at approximately 50%.

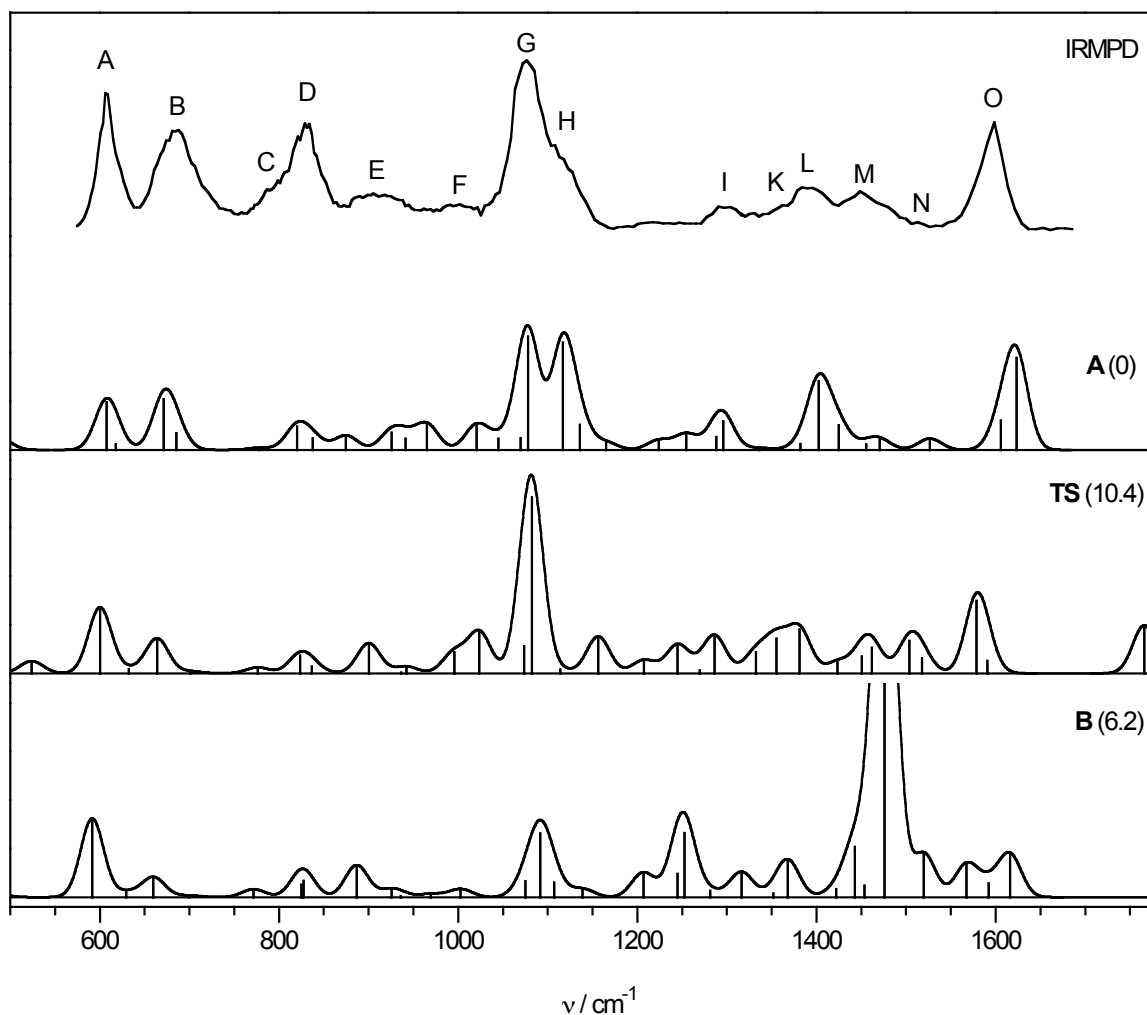

**Figure S8.** Possible structures of the  $m/z=95$  fragment ion calculated at the B3LYP/cc-pVDZ level. Relative energies  $\Delta E$  are given with respect to the most stable **FI\_95** ion. The  $D_0$  values correspond to binding energies for  $\text{NH}_3$  elimination from the **A** isomer of histamine $\text{H}^+$ .

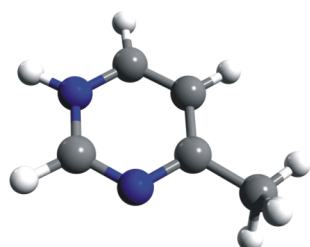

**FI\_95**

$\Delta E_{\text{rel}} = 0 \text{ kJ/mol}$

$D_0 = 79 \text{ kJ/mol}$

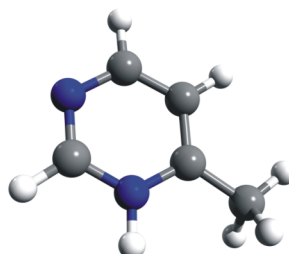

**FII\_95**

$\Delta E_{\text{rel}} = 3 \text{ kJ/mol}$

$D_0 = 82 \text{ kJ/mol}$

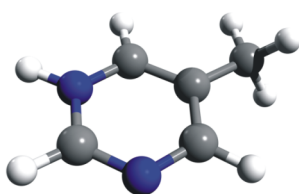

**FIII\_95**

$\Delta E_{\text{rel}} = 17 \text{ kJ/mol}$

$D_0 = 96 \text{ kJ/mol}$

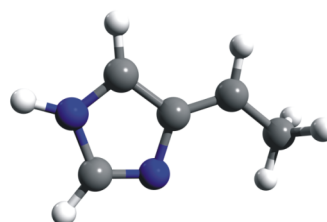

**FIV\_95**

$\Delta E_{\text{rel}} = 75 \text{ kJ/mol}$

$D_0 = 153 \text{ kJ/mol}$

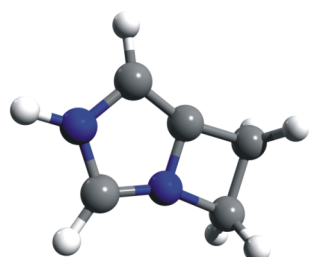

**FV\_95**

$\Delta E_{\text{rel}} = 102 \text{ kJ/mol}$

$D_0 = 181 \text{ kJ/mol}$

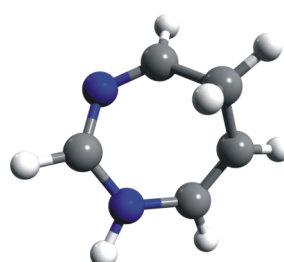

**FVI\_95**

$\Delta E_{\text{rel}} = 108 \text{ kJ/mol}$

$D_0 = 187 \text{ kJ/mol}$

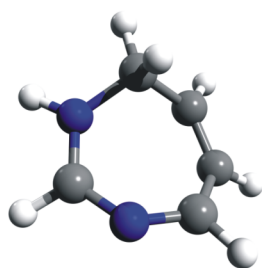

**FVII\_95**

$\Delta E_{\text{rel}} = 132 \text{ kJ/mol}$

$D_0 = 211 \text{ kJ/mol}$

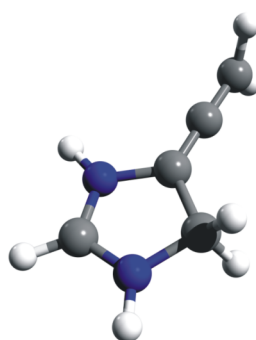

**FVIII\_95**

$\Delta E_{\text{rel}} = 142 \text{ kJ/mol}$

$D_0 = 220 \text{ kJ/mol}$

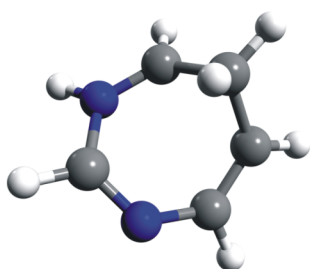

**FIX\_95**

$\Delta E_{\text{rel}} = 156 \text{ kJ/mol}$

$D_0 = 234 \text{ kJ/mol}$

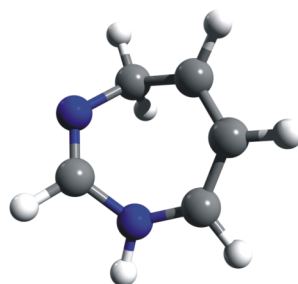

**FX\_95**

$\Delta E_{\text{rel}} = 158 \text{ kJ/mol}$

$D_0 = 237 \text{ kJ/mol}$

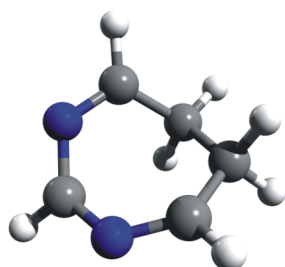

**FXI\_95**

$\Delta E_{\text{rel}} = 217 \text{ kJ/mol}$

$D_0 = 296 \text{ kJ/mol}$

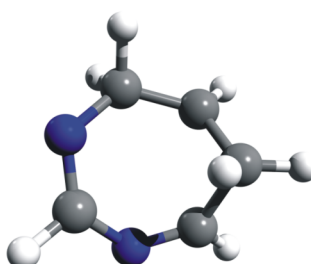

**FXII\_95**

$\Delta E_{\text{rel}} = 329 \text{ kJ/mol}$

$D_0 = 408 \text{ kJ/mol}$

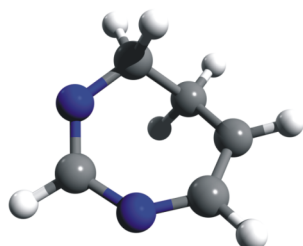

**FXIII\_95**

$\Delta E_{\text{rel}} = 354 \text{ kJ/mol}$

$D_0 = 433 \text{ kJ/mol}$

**Figure S9.** Structures of neutral histamine isomers calculated at the B3LYP/cc-pVDZ level. Relative energies ( $\Delta E$ ) and relative free energies ( $\Delta G$  at 298 K) are given with respect to the most stable structure **A(n)**. Values in parentheses are calculated at the MP2/cc-pVDZ level. All values are given in kJ/mol.

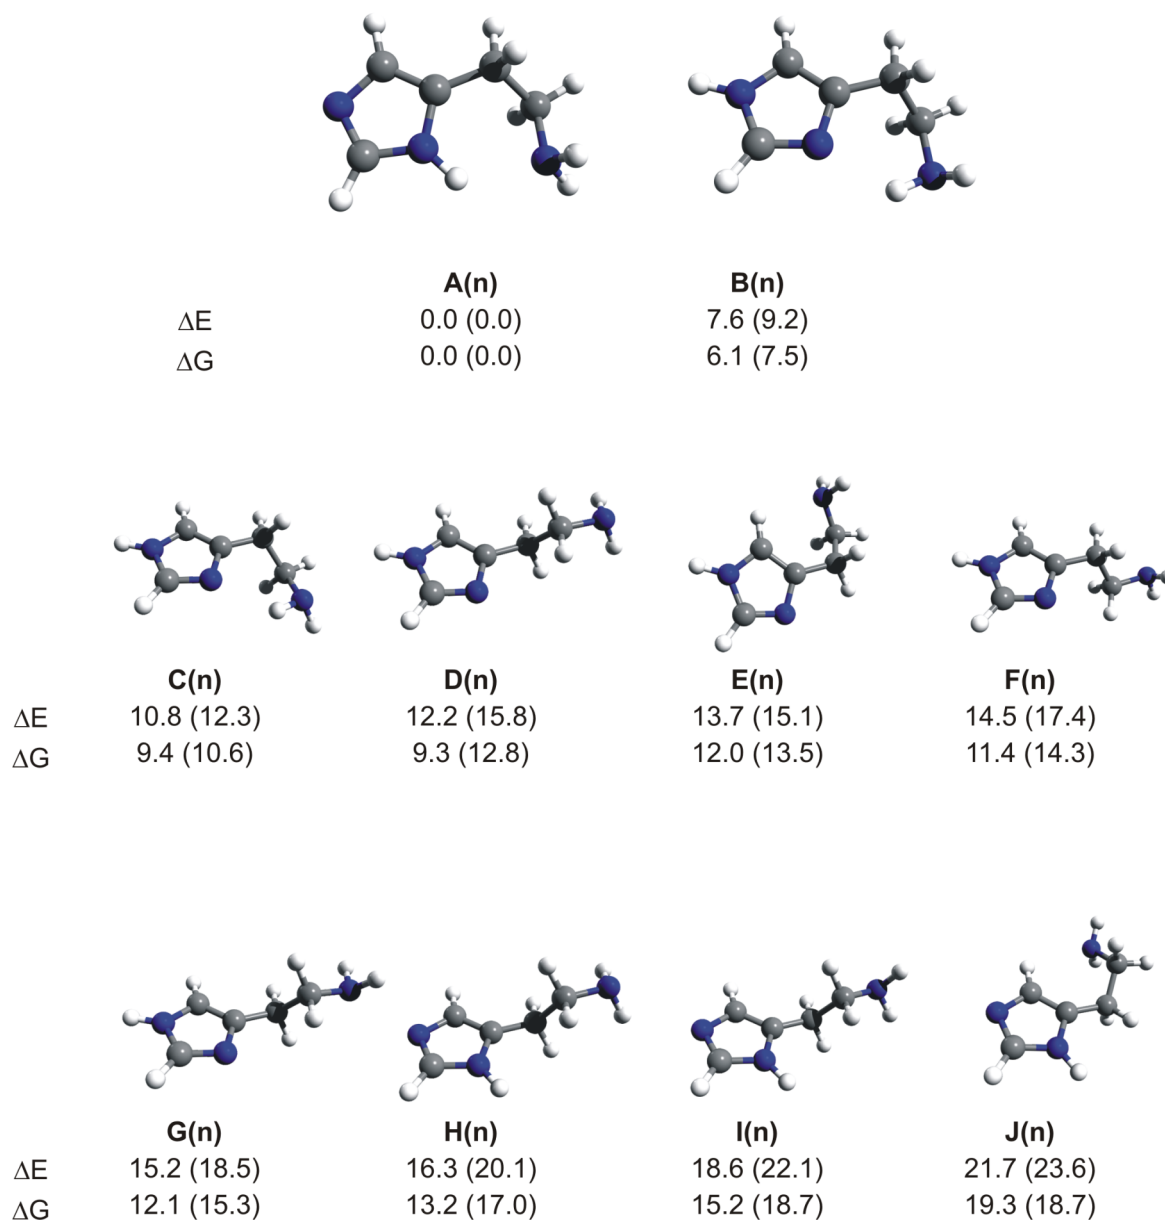



**Figure S10.** Bond distances (in Å) and selected bond angles of the most stable structures of neutral (**A(n)**) and protonated histamine (**A**) calculated at the B3LYP (black) and MP2 (red) levels using the cc-pVDZ basis set.

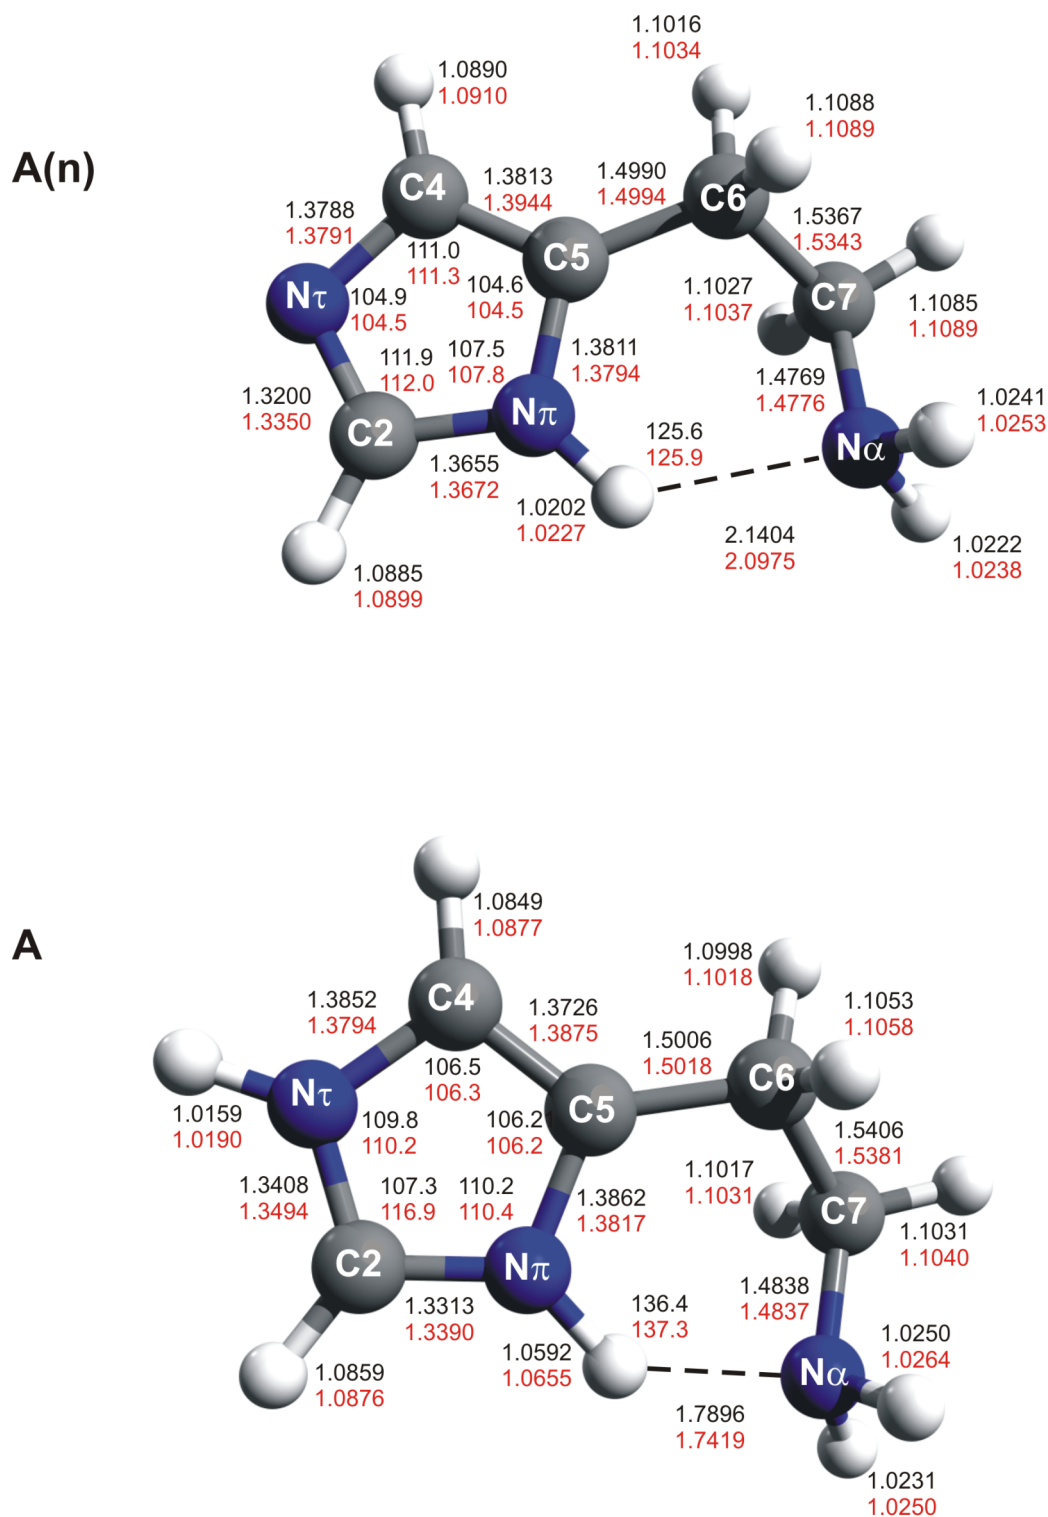

**Figure S11.** NBO charge distribution of the most stable structures of neutral (**A(n)**) and protonated histamine (**A**), calculated at the B3LYP (black) and MP2 (red) levels using the cc-pVDZ basis set.

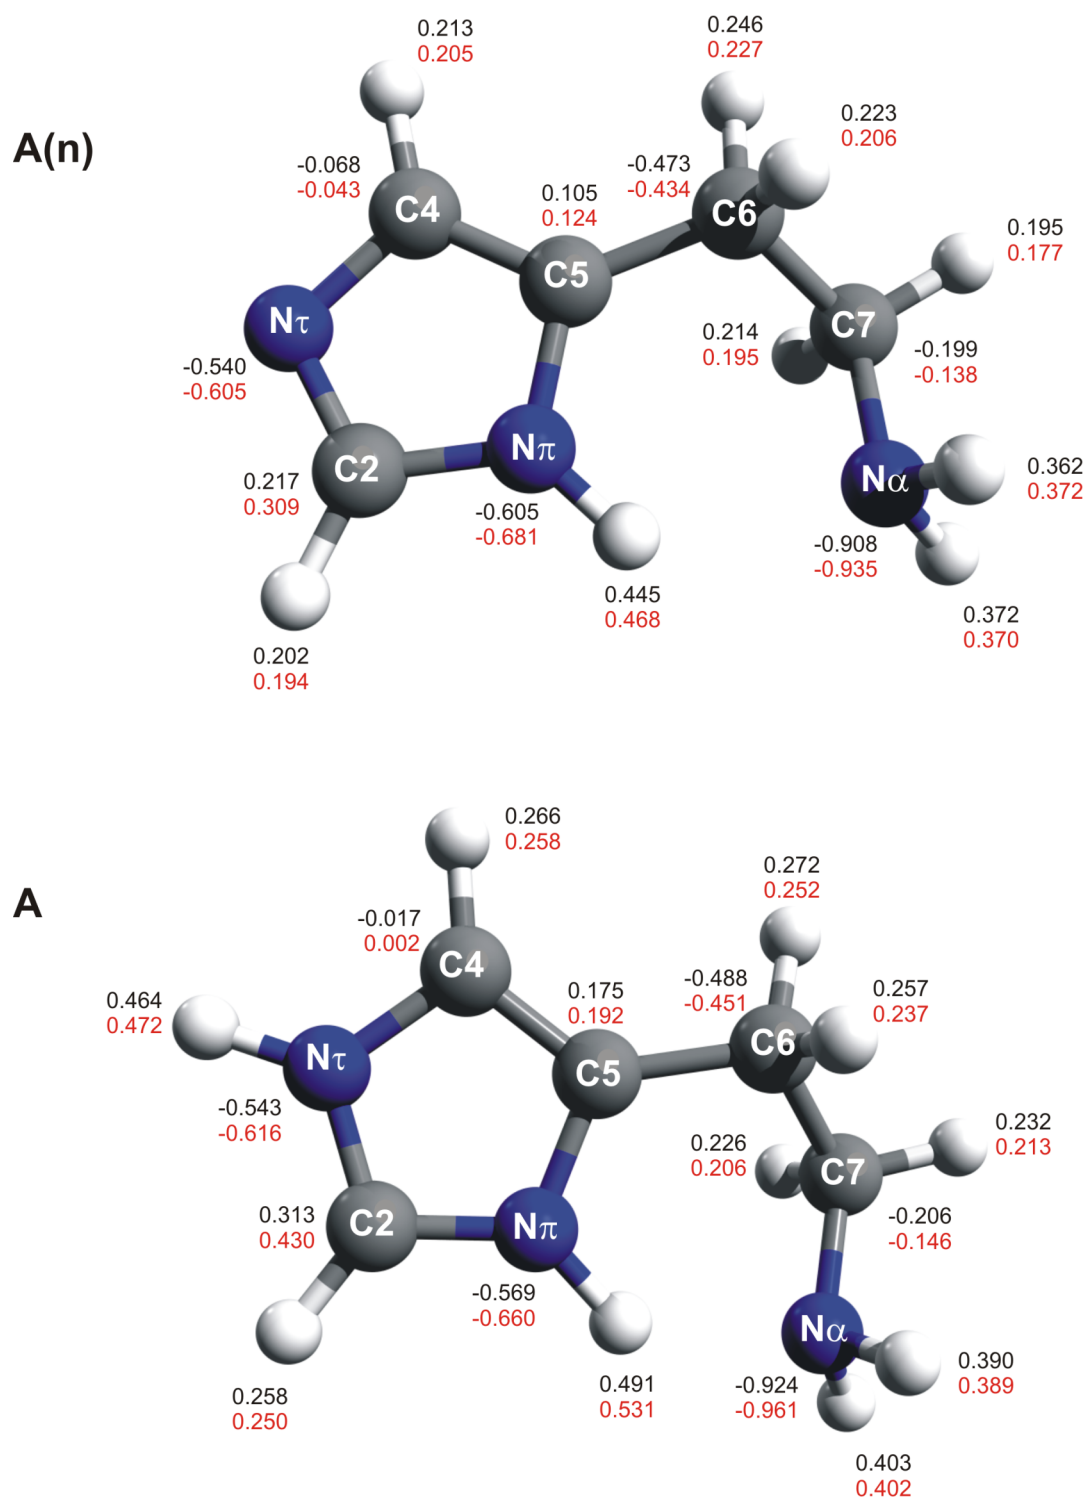

**Figure S12.** Comparison of linear IR absorption spectra of the histamine( $\text{H}^+$ ) isomers **A** and **A(n)** (B3LYP/cc-pVDZ) with the experimental IRMPD spectrum of histamine $\text{H}^+$  and the solid-state spectrum available from the NIST database. Note that the NIST spectrum is spectrally contaminated by oil resonances at  $1450$  and  $1380\text{ cm}^{-1}$ .

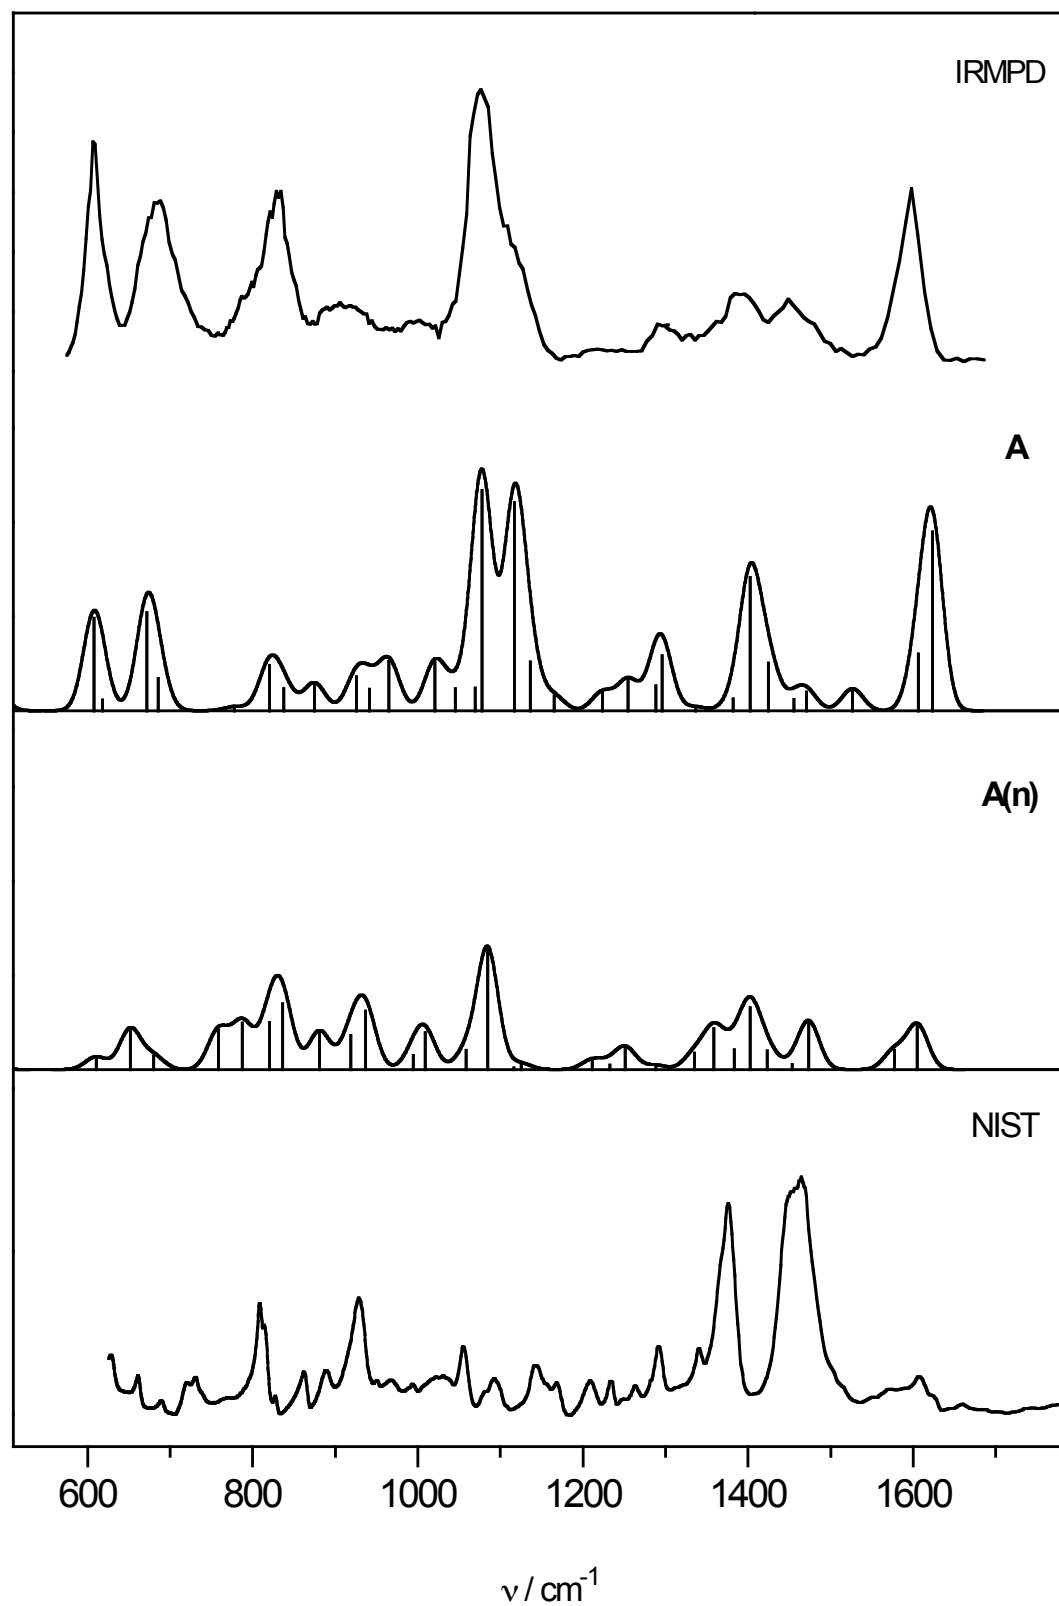

Supplement: c1cp21681c.pdf [file c1cp21681c.pdf]
